# Supplementary material for: The Defective Prophage Pool of Escherichia coli O157: Prophage–Prophage Interactions Potentiate Horizontal Transfer of Virulence Determinants
Source: PubMed Central journal article supplement (PMC2669165; doi:10.1371/journal.ppat.1000408), 2009-05-01
Supplement: ppat.1000408.s002.pdf [file ppat.1000408.s002.pdf]

| Prophage  | Repressor |                     | Antirepressor     |
|-----------|-----------|---------------------|-------------------|
|           | HTH motif | Peptidase S24 motif | DNA binding motif |
| $\lambda$ |           |                     |                   |
| Sp1       |           |                     |                   |
| Sp4       |           |                     |                   |
| Sp5       |           |                     |                   |
| Sp6       |           |                     |                   |
| Sp9       |           |                     |                   |
| Sp10      |           |                     |                   |
| Sp11      |           |                     |                   |
| Sp12      |           |                     |                   |
| Sp14      |           |                     |                   |
| Sp15      |           |                     |                   |
| HK97      |           |                     |                   |
| Rac       |           |                     |                   |
| Phi80     |           |                     |                   |
| P2        |           |                     |                   |
| 186       |           |                     |                   |
| Sp13      |           |                     |                   |
| Mu        |           |                     |                   |
| Sp18      |           |                     |                   |

\* The domain is found in the P4  $\epsilon$  gene product (E) that does not have a DNA binding motif but can bind to repressor C of P2-like prophages to derepress the helper P2 genome [30].
