# Supplementary material for: The Defective Prophage Pool of Escherichia coli O157: Prophage–Prophage Interactions Potentiate Horizontal Transfer of Virulence Determinants
Source: PubMed Central journal article supplement (PMC2669165; doi:10.1371/journal.ppat.1000408), 2009-05-01
Supplement: ppat.1000408.s005.pdf [file ppat.1000408.s005.pdf]

1161086 ttatcttatctggcgggaagcgcagagattcgaactctggaaccccttcgggtcggcgtttcaagaccgaagaa 1161160 L  
 Sp4 cttgattattggcgggaagcgcagagattcgaactctggaaccccttcgggtcggcgtttcaagaccgaagaa P  
 1210877 cttgattattggcgggaagcgcagagattcgaactctggaaccccttcgggtcggcgtttcaagaccggtgcc 1210951 R

1246148 ccatcgtttcaacatgtctaagg 1246170 L  
 Sp5 tcatggtttcaacatgtctaagg P  
 1308856 tcatggtttcaacatgtccgtac 1308878 R

1541606 ttccaccttttattcataagg 1541627 L  
 Sp6 tgttccttcttattcataagg P  
 1590029 tgttccttcttattcagcaga 1590050 R

1594706 agtatggacatatttatca 1594725 L  
 Sp7 taaaaggacatatttatca P  
 1610169 taaaaggacatatttatca 1610188 R

1757521 catgtcagtggtacatggatcgcataccacggcta 1757558 L  
 Sp9 tctaccagtggtacatggatcgcataccacggcta P  
 1815696 tctaccagtggtacatggatcgcataccacggcca 1815733 R

1921506 tgtaattgttcaggtgtattgttcttcttgaattgttgatttcttgc 1921556 L  
 Sp10 ctgactgttcaggtgtattgttcttcttgaattgttgatttcttgc P  
 1972619 ctgactgttcaggtgtattgttcttcttgaattgttgatttgcgac 1972617 R

2593037 gcacaaaaaacccccaaggtggttcacgacactgctattgcttgatttattcttagcttccatggtaccggagcgggactgaaccgcacagcgcgaacgccgaggatttaaaaacta 2593167 L  
 Sp13 atacgaaaaaacccccaaggtggttcacgacactgctattgcttgatttattcttagcttccatggtaccggagcgggactgaaccgcacagcgcgaacgccgaggatttaaaaacta P  
 2614157 atacgaaaaaacccccaaggtggttcacgacactgctattgcttgatttattcttagcttccatggtaccggagcgggactgaaccgcacagcgcgaacgccgaggatttaaatccct 2614287 R

2668143 taaagtggcggagagaggggattgaacccccggtgagtgccccactccggttttcgagacctatgc 2668213 L  
 Sp14 aatttggcggagagaggggattgaacccccggtgagtgccccactccggttttcgagacctatgc P  
 2712172 aatttggcggagagaggggattgaacccccggtgagtgccccactccggttttcgagacctatgc 271224 R

2896041 attaacctgtcacgttacgcgctgacgca 2896071 R  
 Sp15 ttaatccctgtcacgttacgcgctgacgca P  
 2943921 ttaatccctgtcacgttacgcgctggcaga 2943951 L
