# Supplementary material for: The Defective Prophage Pool of Escherichia coli O157: Prophage–Prophage Interactions Potentiate Horizontal Transfer of Virulence Determinants
Source: PubMed Central journal article supplement (PMC2669165; doi:10.1371/journal.ppat.1000408), 2009-05-01

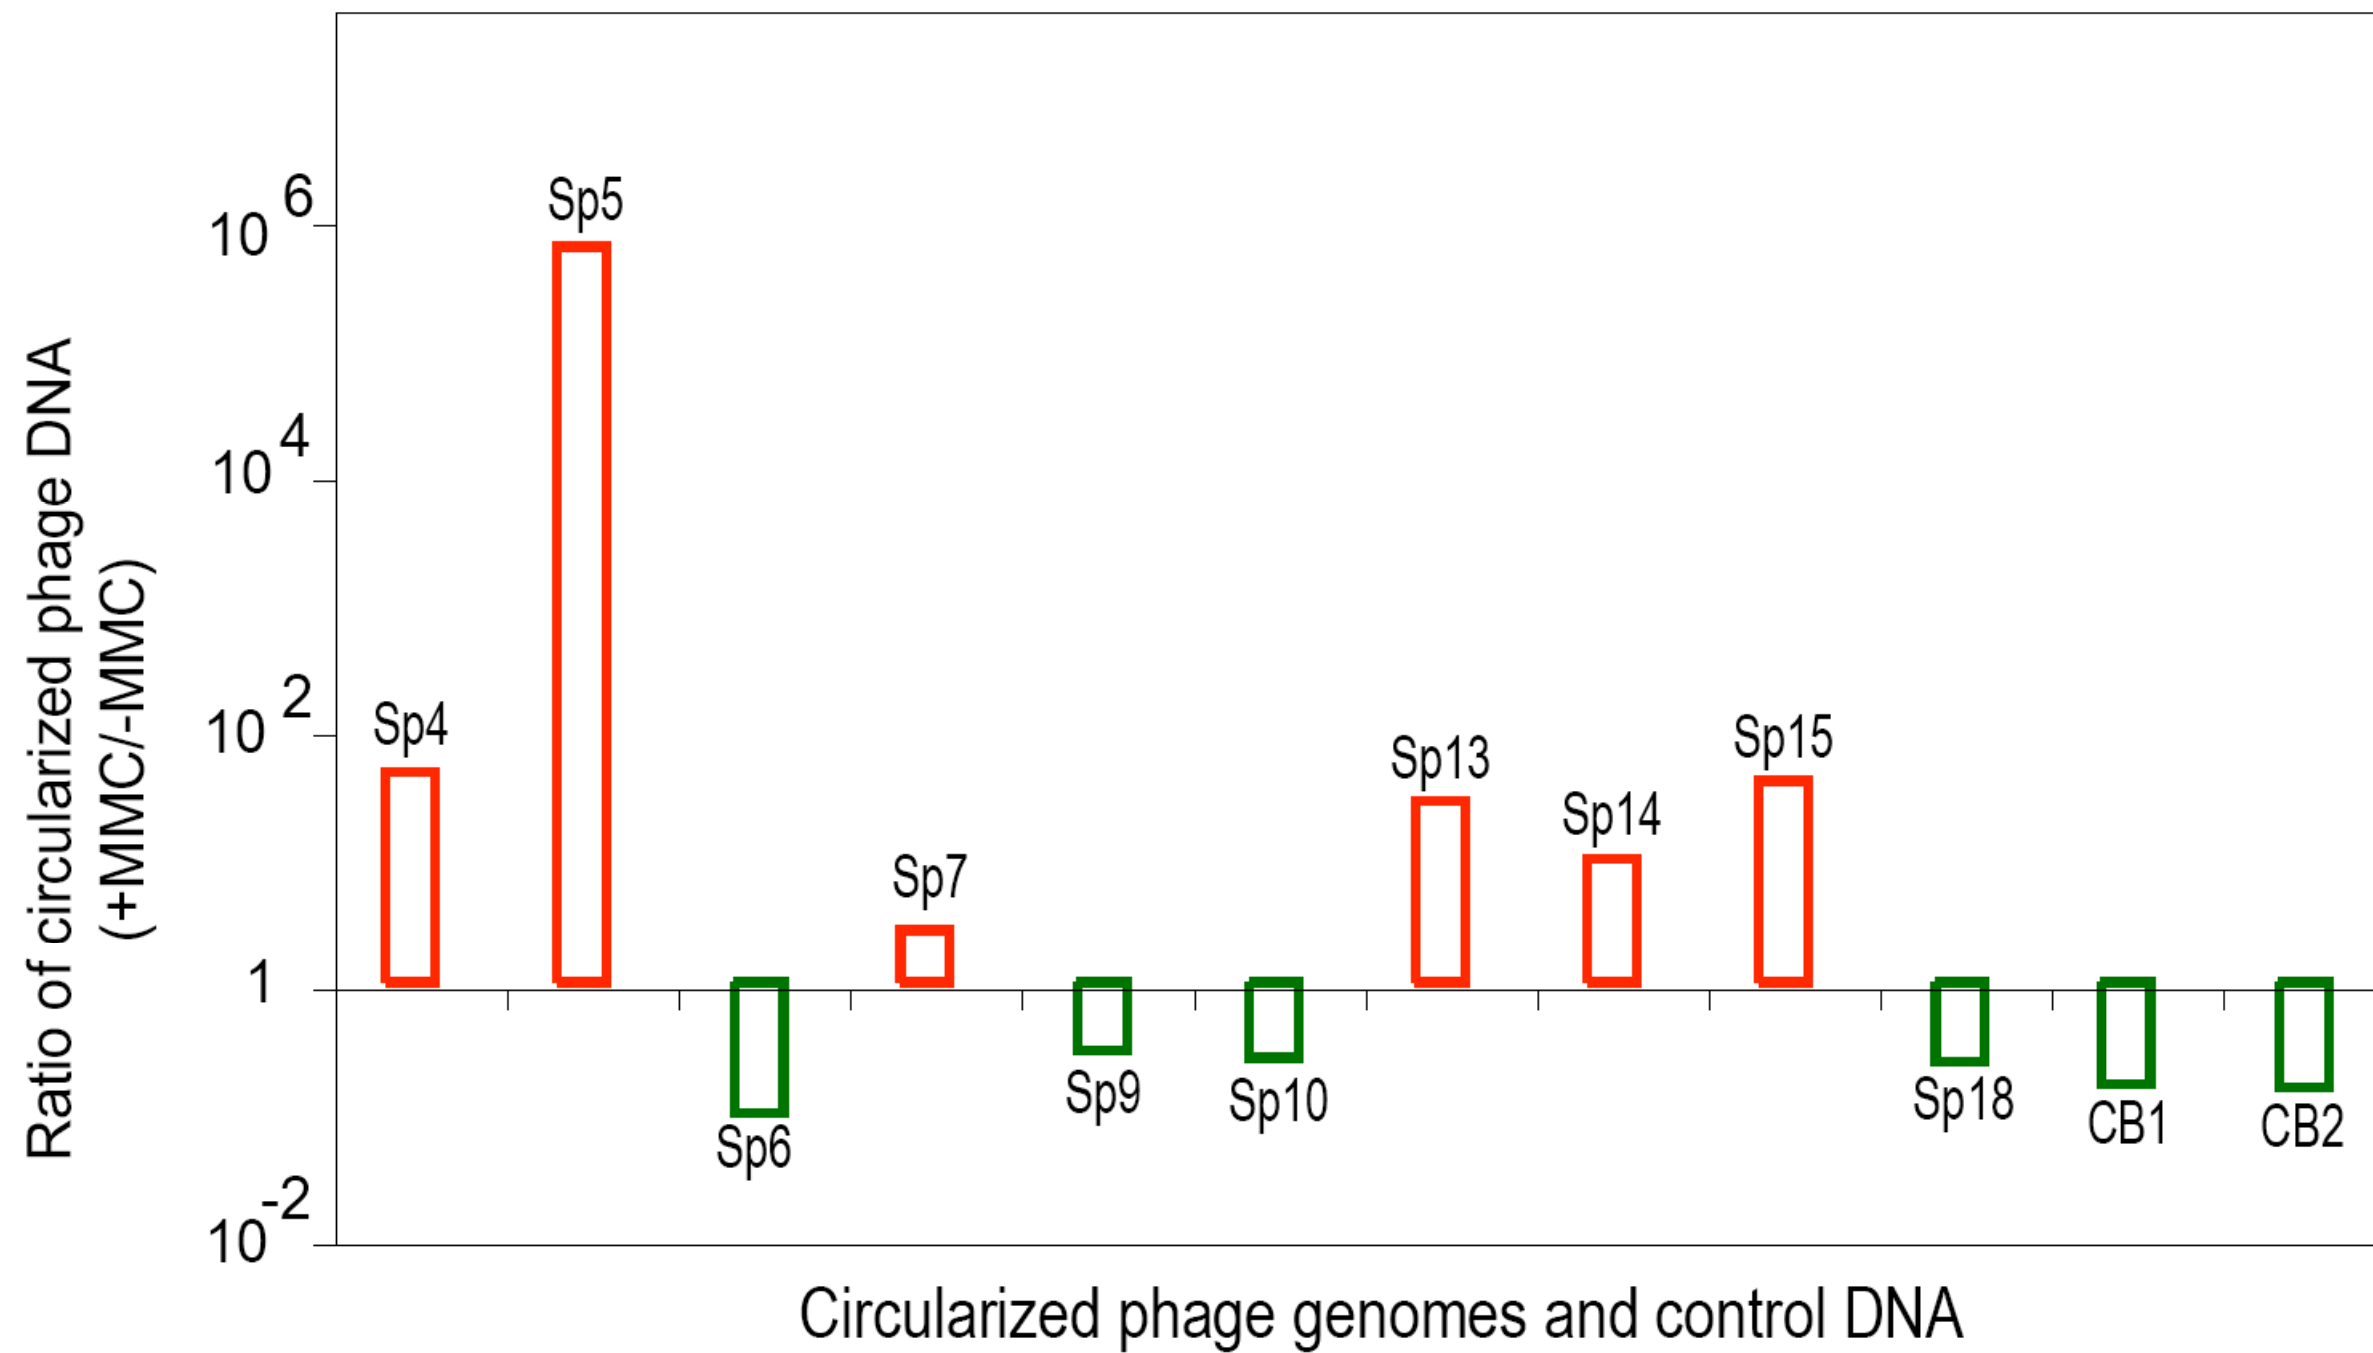

Supplement: ppat.1000408.s006.pdf [file ppat.1000408.s006.pdf]
