# Supplementary material for: The Defective Prophage Pool of Escherichia coli O157: Prophage–Prophage Interactions Potentiate Horizontal Transfer of Virulence Determinants
Source: PubMed Central journal article supplement (PMC2669165; doi:10.1371/journal.ppat.1000408), 2009-05-01
Supplement: ppat.1000408.s008.pdf [file ppat.1000408.s008.pdf]

A

```

                                                                cosQ
                                                                GGGTCCT
Sp4 TAATTAATTATTTGACGTGGTTTGATGGCGTAGATGCACGTTGTGACATGTAGATGATAATTATTATCATTTTTGCGGGTCCTTT -217
Sp14 TAATTAATTATTTGACGTGGTTTGATGGCGTAGATGCACGTTGTGACATGTAGATGATAATTATTATCATTTTTGCGGGTCCTTT -217
λ TAATTGATTATTTGACGTGGTTTGATGGCCTCCACGCACGTTGTGATATGTAGATGATAATCATTATCACTTTACGGGTCCTTT -211

                cosN                                IHF
                TTACGGGGCGGGCGACCTCGCGG          TATGAAAATTTTCCG
Sp4 CCGGCGATCCGACAGGTTACGGGGCGGGCGACCTCGCGGGTTTTTCGCTATTTATGAAAATTTTCCGGGATCCATGT -142
Sp14 CCGGCGATCCGACAGGTTACGGGGCGGGCGACCTCGCGGGTTTTTCGCTATTTATGAAAATTTTCCGGGATCCATGT -142
λ CCGGTGATCCGACAGGTTACGGGGCGGGCGACCTCGCGGGTTTTTCGCTATTTATGAAAATTTTCCGGTTTAAGGCG -136

```

nu1

B

```

Sp4 M-ATQTEVARHLSLTDRQLRRLQKLPGAPI SNKRGQ-----LDLDAWRDFYI--SYLRRSKNDVDPDGSEDDYEKLLIARWEL 76
Sp14 M-ATQTEVARHLSLTDRQLRRLQKLPGAPI SNKRGQ-----LDLDAWRDFYI--SYLRRSKNDVDPDGSEDDYEKLLIARWEL 76
λ MEVNKKQLADIFGASIRTIQNWQE-QGMPVLRGGGKGNEVLYDAAV IKWYAERDAE IENEKLRREVEELRQASEADLQPGTIEYERHRL 89

                ISe8
Sp4 TAEQAVTQQLKKRTAMSKGKLIDTGFCIFALSKLAMALSSTLDSIP LSMQRQFPDLTPRHL DHLKTLIAKGANQCARAGDKLPDLLDEYI 166
Sp14 TAEQAVTQQLKNE--VSKGKLIDTGFCIFALSKLAMALSSTLDSIP LSMQRQFPDLTPRHL DHLKTLIAKGANQCARAGDKLPDLLDEYI 164
λ TRAQADAQELKNA--RDSA EVVETA FCTFVLSRIAGEIASI LDGLPLSVQRRFPELENRHVDFLKRDI IKAMNKAAALDELIPGLLSEYI 177

Sp4 RATTE 171
Sp14 RATTE 169
λ EQSG- 181

```
